# Supplementary material for: Is fear perception special? Evidence at the level of decision-making and subjective confidence
Source: PubMed Central journal article supplement — Soc Cogn Affect Neurosci. 2016 Jul 12;11(11):1772–82. doi: 10.1093/scan/nsw084 (PMC5091676; doi:10.1093/scan/nsw084), 2016-07-12
Supplement: supp_nsw084_suppl_fig.pdf [file supp_nsw084_suppl_fig.pdf]

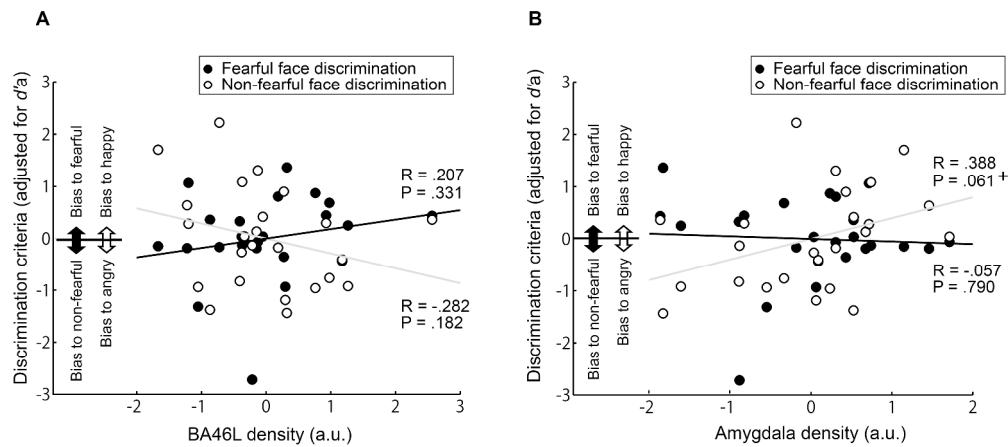

Fig S1 The correlations of discrimination criteria with the gray matter density in (A) BA46L (DLPFC) as well as in (B) Amygdala. For fearful face discrimination (filled circle), a criteria value larger than zero indicates a liberal bias to report perceiving a fearful face. For non-fearful face (i.e., Angry/Happy) discrimination (open circle), a value larger than zero indicates a bias to report perceiving a happy face. Here,  $d'a$  for the corresponding Discrimination task was controlled. That is,  $d'a$  in each of the Discrimination tasks involving a fearful face (i.e., fearful/angry and fearful/happy) was regressed out from criteria in the corresponding task, then the residual criterion value was averaged across the two Discrimination tasks. Similarly,  $d'a$  in the angry/happy Discrimination task was controlled for the correlation analysis with bias in reporting a non-

fearful face. (+  $p < .10$ )  
465x210mm (300 x 300 DPI)
